# Supplementary material for: Empowerment of patients in online discussions about medicine use
Source: PubMed Central journal article supplement (PMC4397724; doi:10.1186/s12911-015-0146-6), 2015-04-08
Supplement: 12911_2015_146_MOESM1_ESM.pdf [file 12911_2015_146_MOESM1_ESM.pdf]

## **Additional file 1 Search queries**

### **ADHD**

ADHD (\$forum.nl OR /forum OR \$forum.\$) (Ritalin OR Concerta OR Medikinet OR  
Eqasym OR Dexamfetamine OR Methylfenidaat OR Atomoxetine OR Lisdexamfetamine  
OR Clonidine OR Imipramine OR Nortriptyline OR Medikinet OR Aderol OR Aderal OR  
Aderall)

### **Diabetes**

Diabetes (\$forum.nl OR /forum OR \$forum.\$) (Insuline OR Novorapid OR Novomis OR  
Levemir OR Lantus OR Apidra OR Humalog OR Actrapid OR Humuline OR Insuman OR  
Acrtrophane OR Huniline OR Mixtard OR Insulatard)

### **ALS**

"Amyotrofe laterale sclerose" (\$forum.nl OR /forum OR \$forum.\$) ("IGF-I" OR Rilutek OR  
Glentek OR Riluzol OR Xaliproden OR Arimoclomol OR Dexpramipexole OR Thalidomide  
OR Lenalidomide)
